# Supplementary material
Source: Springer Nature journal article supplement (https://www.springermedizin.de/resource/supplementary/12967_2013_1734_MOESM3_ESM.pdf/9575138)

Ad.CA-EGFP/RGD Ad.CA-EGFP

MOI 0.1

MOI 1

MOI 10

MOI 30

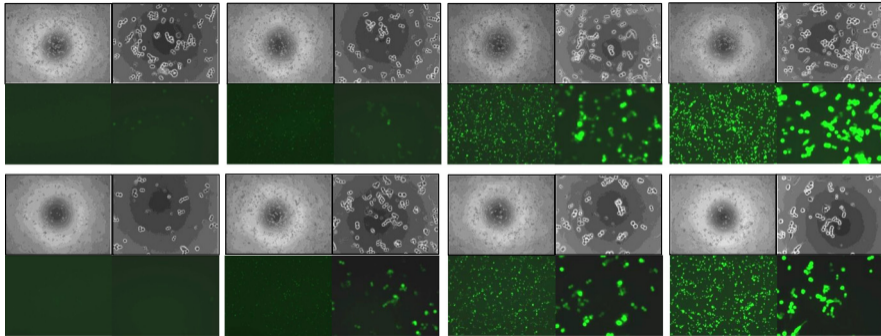

50 x

200 x

Supplement: MOESM3 [file 9575138]
